# Supplementary material for: The clustered gamma protocadherin PcdhγC4 isoform regulates cortical interneuron programmed cell death in the mouse cortex
Source: PubMed Central journal article supplement — Proc Natl Acad Sci U S A. 2024 Jan 29;121(6):e2313596120. doi: 10.1073/pnas.2313596120 (PMC10861877; doi:10.1073/pnas.2313596120), 2024-01-29
Supplement: pnas.2313596120.sapp.pdf [file pnas.2313596120.sapp.pdf]

## **Supporting Information for The Clustered Gamma Protocadherin PcdhyC4 Isoform Regulates Cortical Interneuron Programmed Cell Death in the Mouse Cortex.**

Walter R Mancia Leon<sup>1,7</sup>, David M Steffen<sup>1,5,6,7</sup>, Fiona R Dale-Huang<sup>1</sup>, Benjamin Rakela<sup>2</sup>, Arnar Breevoort<sup>2</sup>, Ricardo Romero-Rodriguez<sup>1</sup>, Andrea R Hasenstaub<sup>3,4</sup>, Michael P Stryker<sup>2,4</sup>, Joshua A Weiner<sup>5,6</sup>, Arturo Alvarez-Buylla<sup>1,4,\*</sup>

1. Department of Neurological Surgery and The Eli and Edythe Broad Center of Regeneration Medicine and Stem Cell Research, University of California, San Francisco, San Francisco, United States.
2. Department of Physiology University of California, San Francisco, San Francisco, United States.
3. Department of Otolaryngology-Head and Neck Surgery, University of California, San Francisco, San Francisco, United States.
4. Kavli Institute for Fundamental Neuroscience, University of California, San Francisco, San Francisco, United States
5. Iowa Neuroscience Institute, The University of Iowa, Iowa City, IA 52242
6. Department of Biology, The University of Iowa, Iowa City IA 52242
7. These authors contributed equally

\*Corresponding author: [alvarezbuylla@ucsf.edu](mailto:alvarezbuylla@ucsf.edu)

**This PDF file includes:**

Figures S1 to S6

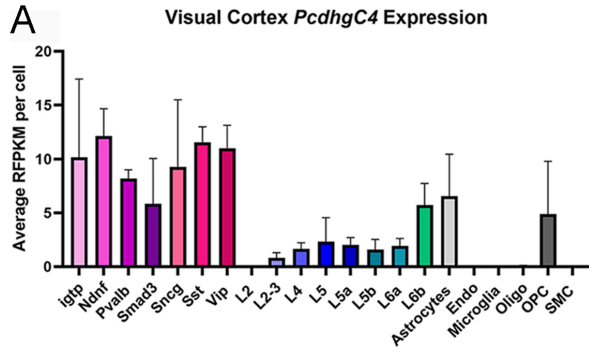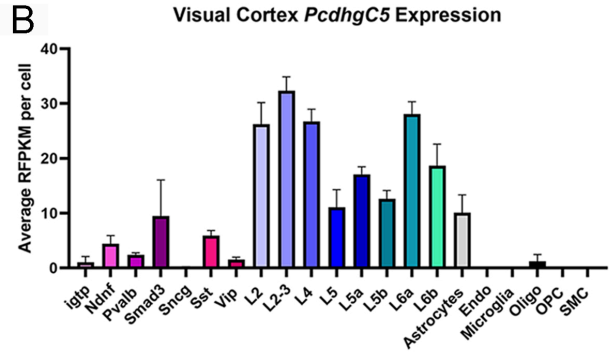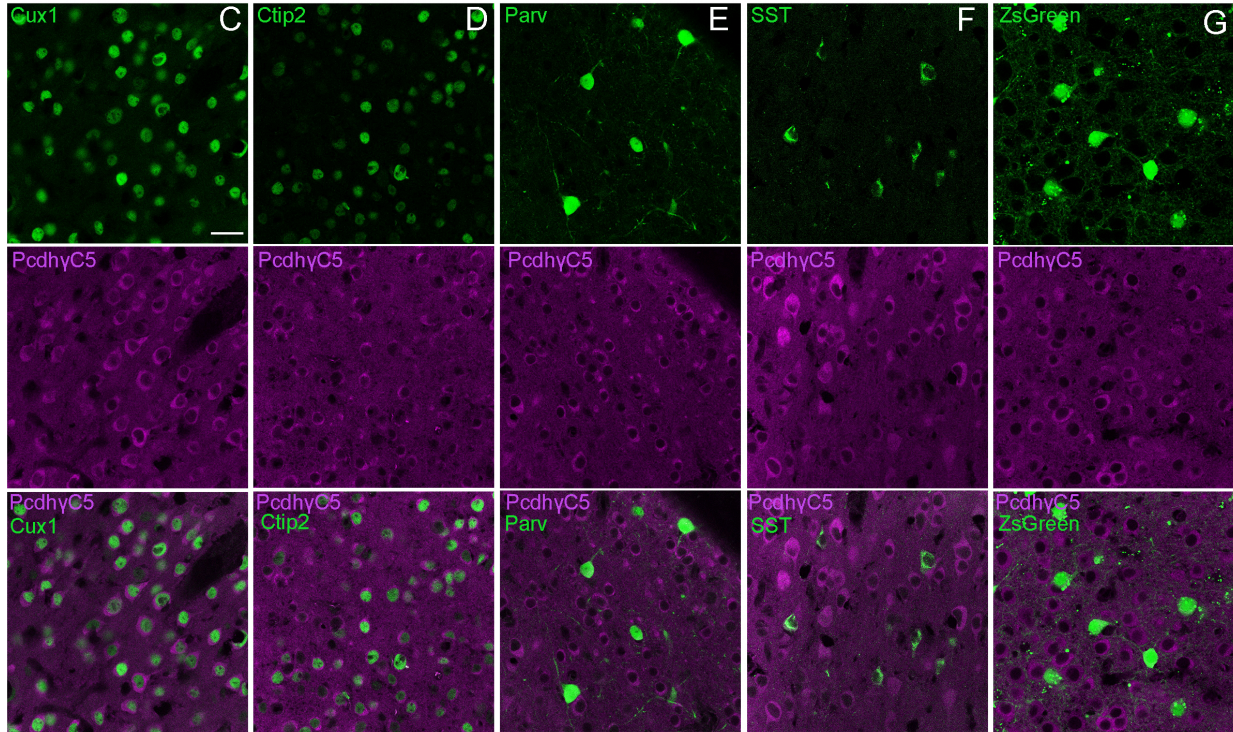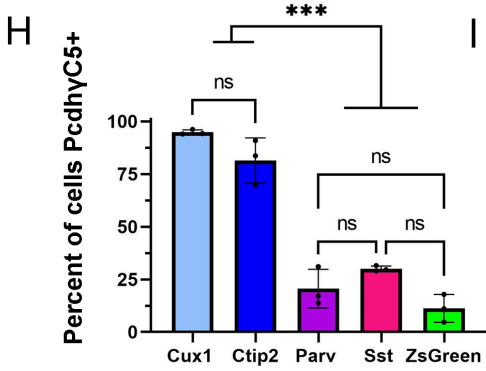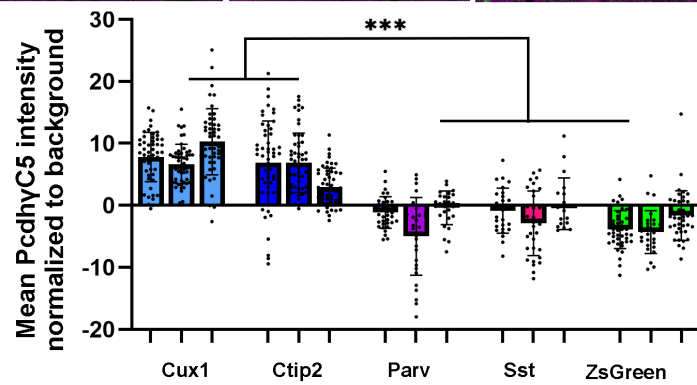

## Supplementary Figure 1 - PcdhyC5 expression in excitatory cortical neurons.

**A-B.** Inhibitory neuron subtypes show enriched PcdhyC4 expression (A), contrasting glutamatergic neuron subtypes which have enriched PcdhyC5 expression (B). Error bars represent the SEM. Interferon gamma-induced GTPase (Igtg), Neuron-derived neurotrophic factor (Ndnf), Parvalbumin (Pvalb), Somatostatin (SST), and Vasoactive intestinal peptide-expressing (Vip). Error bars represent the SEM.

**C-G.** Immunostainings in P14 mouse visual cortex show PcdhyC5 expression in excitatory neurons (Cux1 and Ctip2)(C-D) and GABAergic neurons (Parv), SST, or MGE derived cINs from the Nkx2.1; ZsGreen reporter mouse) (E-G). Scale bar = 25  $\mu$ m.

**H.** Quantification of PcdhyC5 positive neuronal subtypes in the visual cortex of P14 mice. Most upper layer (94.8% of Cux1<sup>+</sup>) or lower layer (81.5% of Ctip2<sup>+</sup>) excitatory neurons co-express the PcdhyC5 protein. In contrast, the majority of MGE-derived GABAergic cINs are negative for PcdhyC5 expression. PcdhyC5 is expressed by 11.2% of MGE-derived ZsGreen<sup>+</sup> cINs, 20.6% PV<sup>+</sup> cINs, and 30.0% of SST<sup>+</sup> cINs. n = 3 animals per genotype, at least 77 cells quantified per condition. T-test; \*\*\*p = 0.003 ; ns = not significant. Error bars represent SD.

**I.** Quantifications of the mean signal intensity of PcdhyC5 staining in cortical neuron subtypes in P14 mouse visual cortex. Upper (Cux1) and lower (Ctip2) layer excitatory neurons showed higher levels of PcdhyC5 signal than cINs (PV, SST, or MGE-derived ZsGreen<sup>+</sup>). n = 3 animals per genotype, at least 77 cells quantified per condition. Nested t test; \*\*\*p = 0.0006. Error bars represent SD.

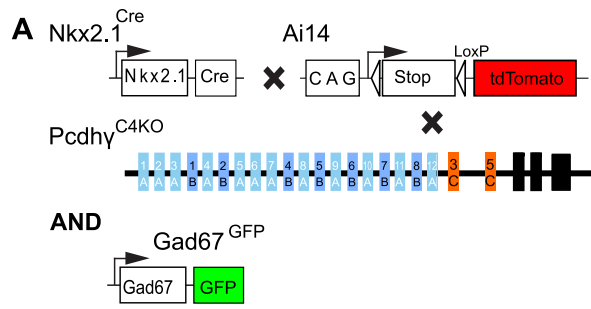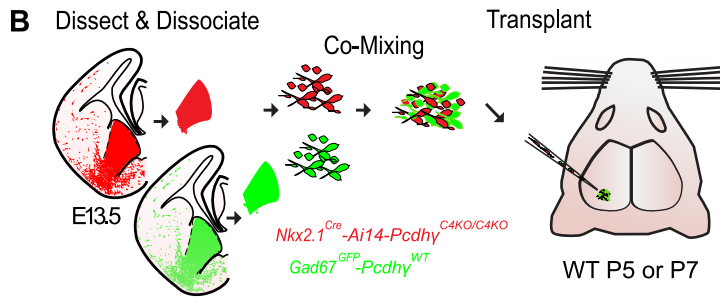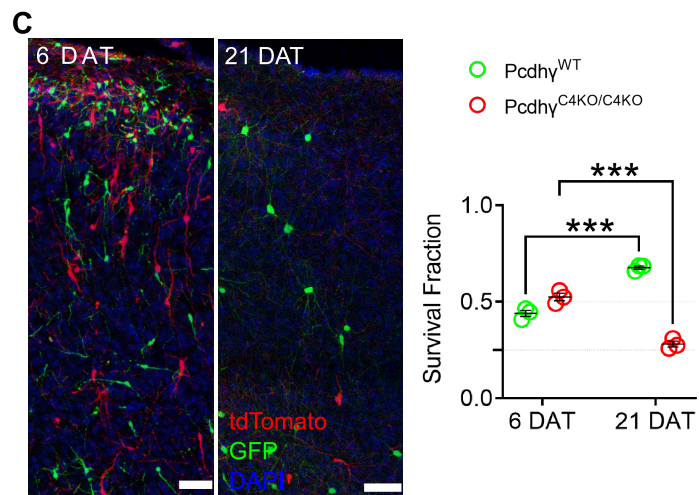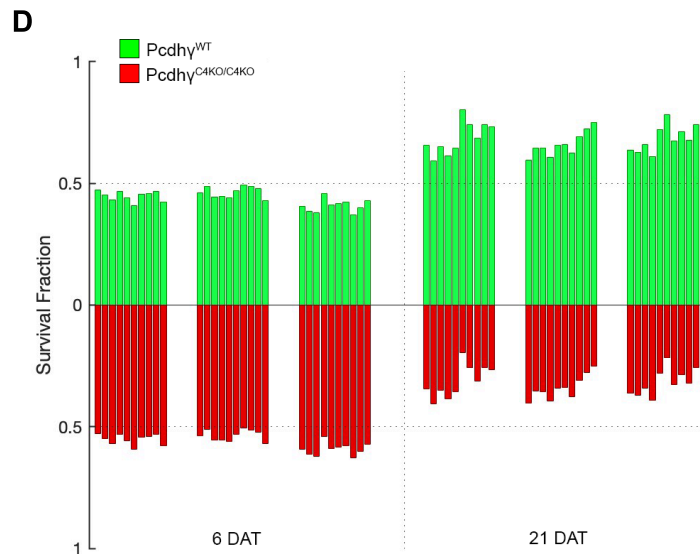

## Supplementary Figure 2 - Genetic deletion of PcdhyC4 increased cell death in MGE-derived cINs.

**A.** Diagram of genetic crosses. Pcdhy<sup>C4KO</sup> homozygous MGE cells were labeled via the MGE/POA-specific genetic reporter Nkx2.1<sup>Cre</sup> mice that also carry the conditional Ai14 allele. Control Pcdhy<sup>WT</sup> MGE cells were labeled with GFP via the Gad67-GFP reporter mouse line.

**B.** Schematics of transplantation protocol. The MGEs of Pcdhy<sup>C4KO</sup> homozygous mutant or control E13.5 embryos were dissected, dissociated, and mixed in similar proportions. The mixture of GFP<sup>+</sup> (Pcdhy<sup>WT</sup>) and tdTomato<sup>+</sup> (Pcdhy<sup>C4KO/C4KO</sup>) cells were grafted into the cortex of WT neonate mice.

**C.** Left - Confocal images from the cortex of 6 and 21 DAT mice. The transplanted cells were labeled with GFP (Pcdhy<sup>WT</sup>) or tdTomato (Pcdhy<sup>C4KO/C4KO</sup>). Right - Quantifications (shown as survival fraction) of surviving GFP or tdTomato labeled MGE-derived cINs at 6 and 21 DAT. Both the GFP and tdTomato labeled cells undergo PCD between 6 and 21 DAT, but Pcdhy<sup>C4KO/C4KO</sup> cells are eliminated at higher rates.

**D.** Survival fraction quantification from (C) shown by the brain section (each bar) and separated by animals at 6 and 21 DAT.

Scale bar = 50 um, Nested-ANOVA, \*\*\*p = 0.0002, n = 3 mice per time point, and 10 brain sections quantified per mouse. DAT 6 cell counted = 11,281, DAT 21 cells counted = 2,683

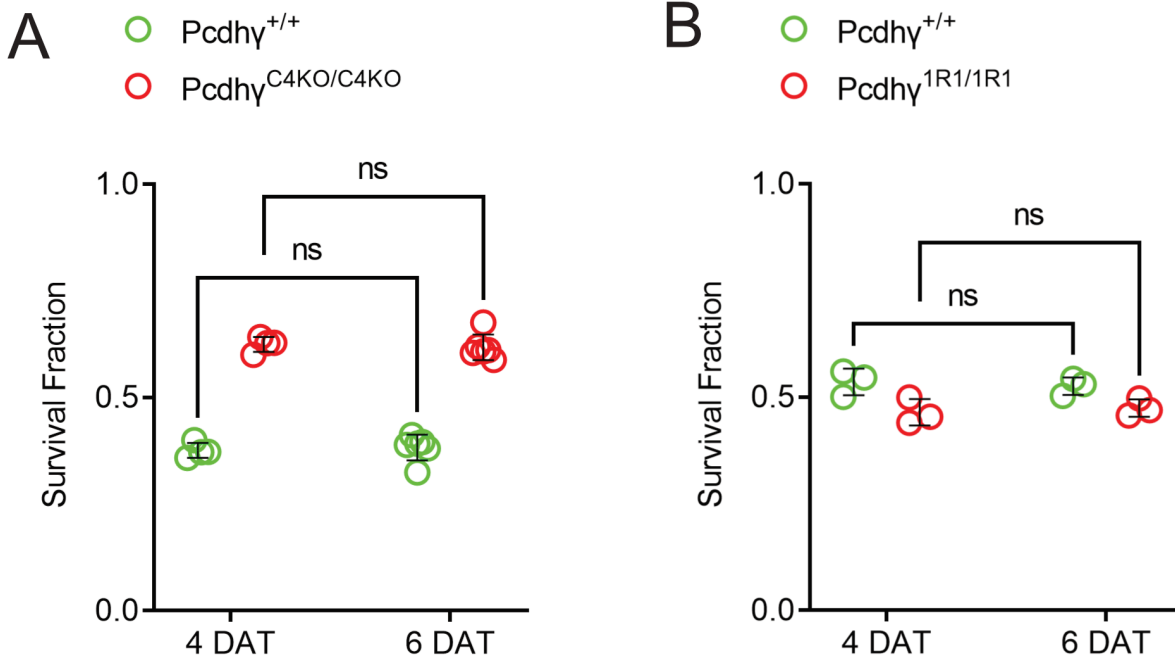

**Supplementary Figure 3 - Survival fractions of transplanted MGE-derived cINs remains consistent prior to PCD.**

**A.** Quantification of survival fractions from co-transplanted  $Pcdhy^{C4KO/C4KO}$  (tdTomato) and  $Pcdhy^{WT}$  (GFP) MGE-derived cINs at 4 and 6 DAT. There was no apparent change in the proportion of tdTomato to GFP cells between 4 and 6 DAT, before the period of naturally occurring cell death for transplanted cells. Nested-ANOVA,  $n \geq 4$  mice per time point, and 10 brain sections quantified per mouse.

**A.** Quantification of survival fractions from co-transplanted  $Pcdhy^{1R1/1R1}$  (tdTomato) and  $Pcdhy^{WT}$  (GFP) MGE-derived cINs at 4 and 6 DAT. There was no apparent change in the proportion of tdTomato to GFP cells between 4 and 6 DAT, before the period of naturally occurring cell death for transplanted cells. Nested-ANOVA,  $n = 3$  mice per time point, and 10 brain sections quantified per mouse.

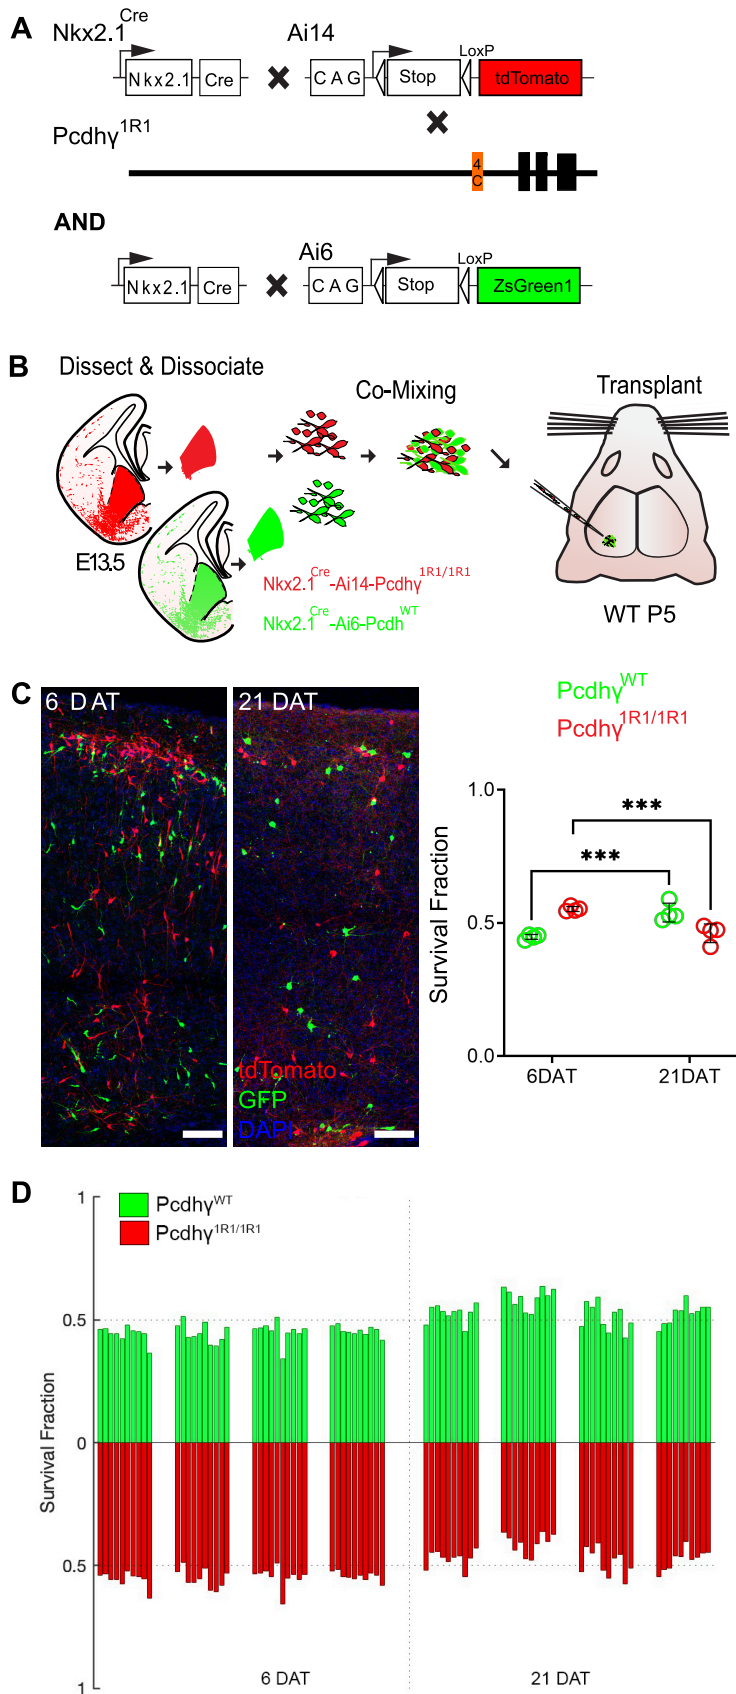

**Supplementary Figure 4 - Expression of PcdhyC4 is sufficient for the survival of most MGE-derived cINs.**

**A.** Diagram of genetic crosses between MGE/POA-specific reporter Nkx2.1Cre;Ai14 and Pcdhy<sup>1R1</sup> mice. Control cells were obtained from Gad67-GFP embryos.

**B.** Schematics of transplantation protocol. The MGEs from E13.5 Pcdhy<sup>1R1</sup> homozygous or control embryos were dissected, dissociated, and mixed in similar proportions. The mixture of GFP<sup>+</sup> (Pcdhy<sup>WT</sup>) and tdTomato<sup>+</sup> (Pcdhy<sup>1R1/1R1</sup>) cells was grafted into the cortex of WT neonate mice.

**C.** Left - Confocal images from the cortex of 6 and 21 DAT mice. The transplanted cells are labeled with GFP (Pcdhy<sup>WT</sup>) or tdTomato (Pcdhy<sup>1R1/1R1</sup>). Right - Quantifications (shown as survival fraction) of surviving MGE-derived cINs at 6 and 21 DAT. Both the transplanted GFP and tdTomato-labeled cells undergo PCD between 6 and 21 DAT, but the Pcdhy<sup>1R1/1R1</sup> cells are eliminated at slightly higher rates.

**D.** Survival fraction quantification from (C) shown by individual brain sections (each bar) and separated by animals at 6 and 21 DAT.

Scale bar = 50 um, Nested-ANOVA , \*\*\*p = 0.009 , n = 3 mice per time point and 10 brain sections per mouse. DAT 6 cell counted = 6,030, DAT 21 cells counted = 1,609



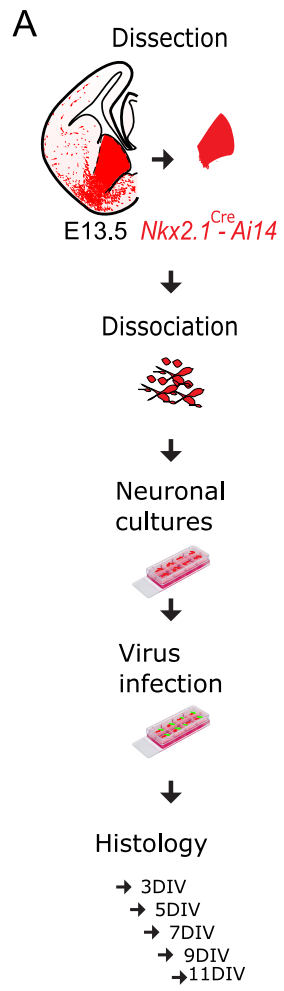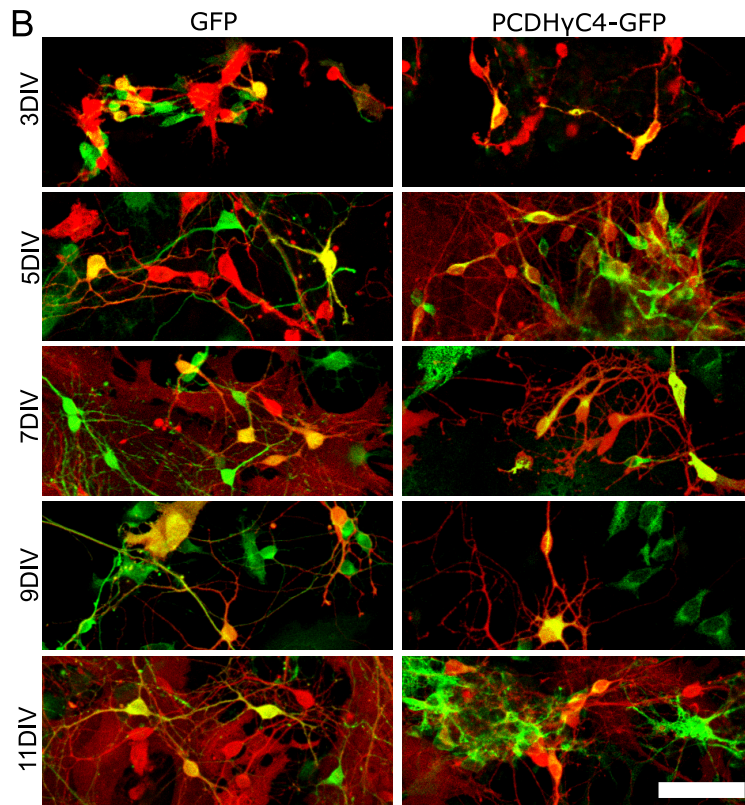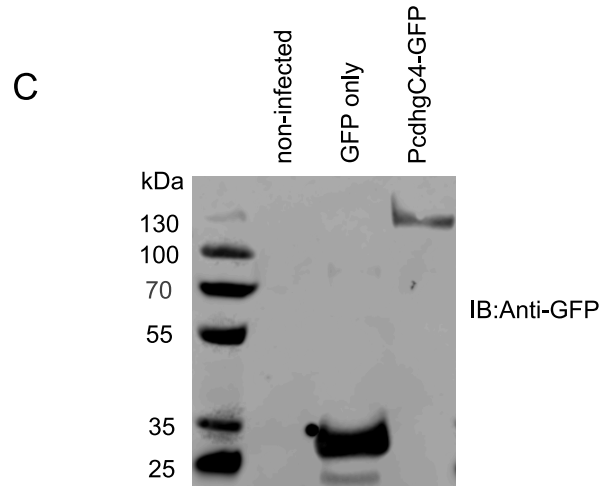

## **Supplementary Figure 5 - Infection with lentivirus and expression of GFP in cell cultures of cINs**

**A.** Diagram of the vitro culture assay, infection, and imaging of cINs expressing lentiviral driven GFP, or PcdhyC4-GFP protein. MGE-derived cIN precursor cells at E13.5 were cultured on a layer of cortical feeder cells of an equivalent age, and infected with lentivirus. Cells were imaged at 3, 5, 7, 9, or 11 days in vitro (DIV).

**B.** Representative images of the transduced cells at 3, 5, 7, 9, or 11 DIV. MGE-derived cells are labeled with tdTomato expression. All transduced cells were identified via the expression of GFP. The transduced MGE-derived cells express both GFP and tdTomato proteins. Note that the lentiviral-driven PcdhyC4-GFP protein appears to be preferentially localized to the cell surface, but it is also found in the cell soma, and perisomatic regions, as well as in the axons and dendrites. In contrast, the GFP signal appears to fill the entire area of cells expressing the control lentiviral-driven GFP protein. Scale bar = 25nm.

**C.** Immunoblot against GFP from non-infected control neuronal cultures and lentiviral-infected neuronal cultures expressing GFP or PcdhyC4-GFP. No GFP band was detected in the non-infected sample (left lane). A GFP band of ~26k was detected in samples infected with a virus expressing GFP (middle lane). A band size of ~130 kD, corresponds to the expected size for the PcdhyC4 protein fused to GFP, was detected in samples infected with virus expressing PcdhyC4-GFP (right lane). Note that due to the high infection rate of the GFP only lentivirus, the protein sample was diluted 1:2 as compared to the control and PcdhyC4-GFP conditions.

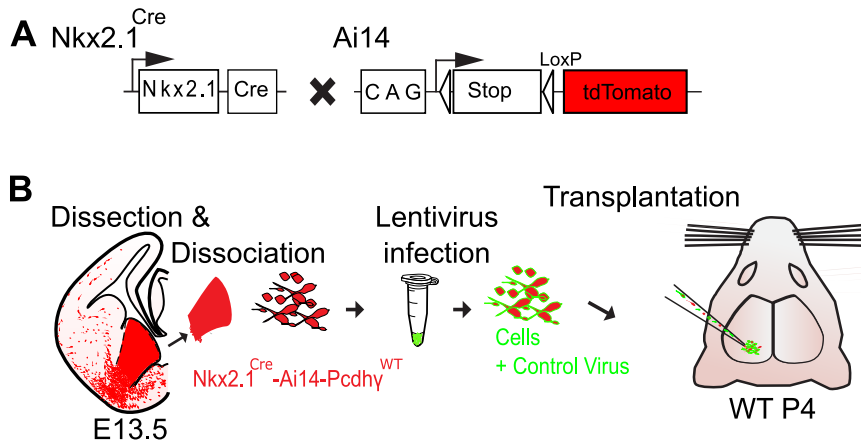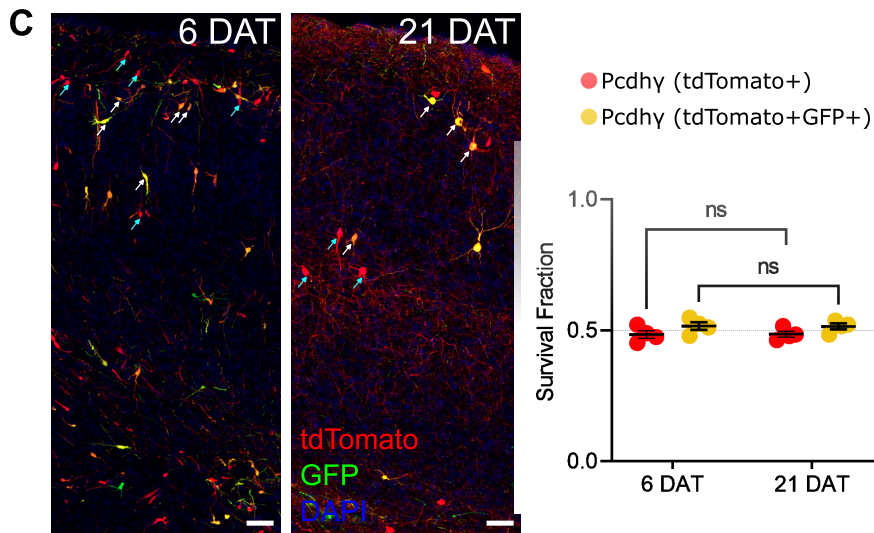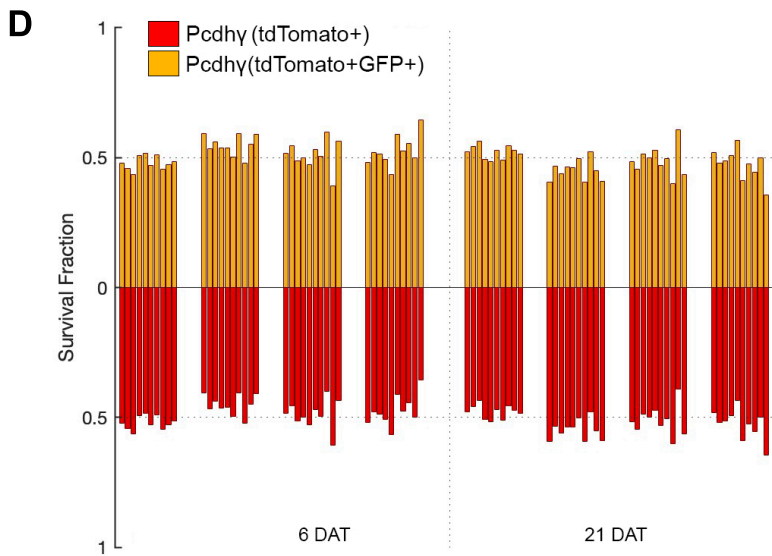

**Supplementary Figure 6 - Infection with lentivirus and expression of GFP does not affect the survival of cINs**

**A.** Diagram of mouse crosses to obtain  $Pcdhy^{WT}$  MGE cells labeled with MGE/POA-specific genetic reporter.

**B.** Schematic of lentiviral infection and transplantation of MGE cIN precursors. The MGEs of  $Nkx2.1^{Cre};Ai14$  embryos that carry  $Pcdhy^{WT}$  were dissected, dissociated, and infected in suspension with lentivirus-expressing GFP. The infected cells were grafted into the cortex of WT recipient mice P0-P8.

**C.** Confocal acquired images of the transplanted cINs in the cortex at 6 and 21 DAT. Notice that all transplanted cells are labeled with tdTomato (red), while cells expressing virally-driven GFP are labeled in green. Quantifications of the tdTomato<sup>+</sup> only (teal arrows) or tdTomato<sup>+</sup>GFP<sup>+</sup> (yellow cells, white arrows) cells are shown as the fraction of cells from the total tdTomato<sup>+</sup> cells at 6 and 21 DAT.

**D.** Survival fraction quantifications from (C) shown as individual brain sections (each bar) and separated by animals at 6 and 21 DAT.

Scale bar = 50  $\mu$ m, Nested-ANOVA, ns = not significant, n = 4 mice per time point, and 10 brain sections per mouse from one transplant cohort. DAT6 cell counted = 17,288, DAT21 cells counted = 2,779
